# Supplementary material for: Polymer electrolyte membranes based on poly(m-phenylene)s with sulfonic acid via long alkyl side chains
Source: Royal Society of Chemistry journal article supplement (doi:10.1039/c2py20836a), 2012-12-05
Supplement: c2py20836a.pdf [file c2py20836a.pdf]

## Electronic Supplementary Information

# **Polymer Electrolyte Membranes Based on Poly(*m*-phenylene)s with Sulfonic Acid via Long Alkyl Side Chains**

Xuan Zhang, Li Sheng, Tomoya Higashihara\*, and Mitsuru Ueda\*

Department of Organic and Polymeric Materials, Tokyo Institute of Technology,

2-12-1-H120, O-okayama, Meguro-ku, Tokyo 152-8552, Japan.

Fax: +81-3-5734-2127, E-mail: [thigashihara@polymer.titech.ac.jp](mailto:thigashihara@polymer.titech.ac.jp);

[ueda.m.ad@polymer.titech.ac.jp](mailto:ueda.m.ad@polymer.titech.ac.jp)

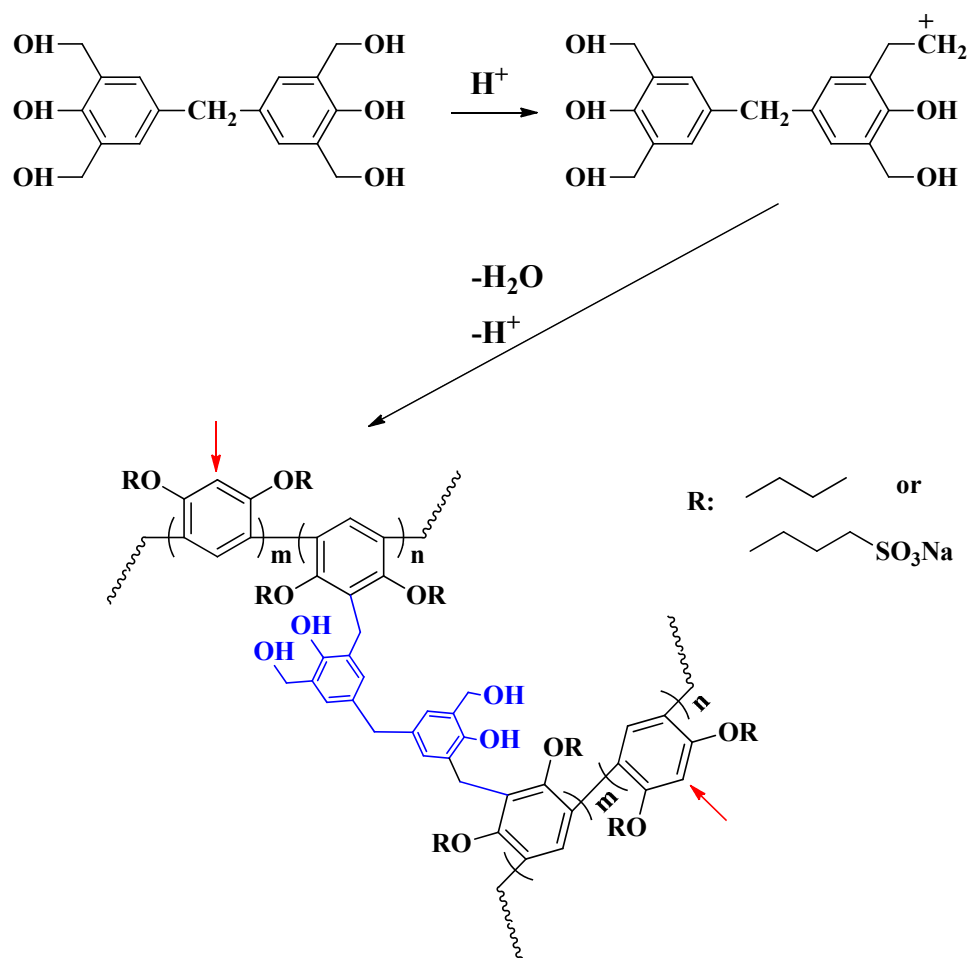

Scheme S1 Structures of **c-SPMPs** (red arrows: possible cross-linking sites).
